# Supplementary material for: Improved Yield and Photosynthate Partitioning in AVP1 Expressing Wheat (Triticum aestivum) Plants
Source: PubMed Central journal article supplement (PMC7090233; doi:10.3389/fpls.2020.00273), 2020-03-17

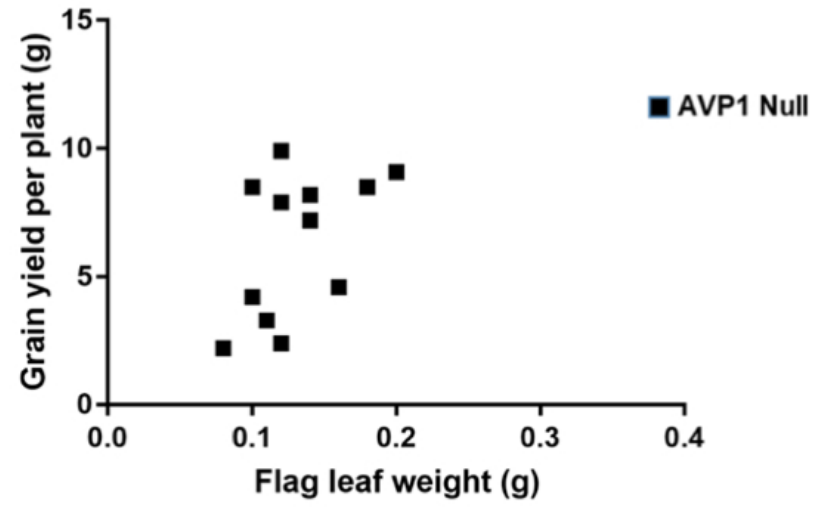

Supplement: Table_1.pdf [file Table_1.pdf]
